# Supplementary material for: Changes in fibroblast growth factor 23 levels in normophosphatemic patients with chronic kidney disease stage 3 treated with lanthanum carbonate: results of the PREFECT study, a phase 2a, double blind, randomized, placebo-controlled trial
Source: PubMed Central journal article supplement (PMC4107721; doi:10.1186/1471-2369-15-71), 2014-05-05
Supplement: 1471-2369-15-71-S2.pdf [file 1471-2369-15-71-S2.pdf]

**Supplementary Figure 1. Change in (a) iPTH and (b) 1,25-dihydroxyvitamin D over the course of the study.**

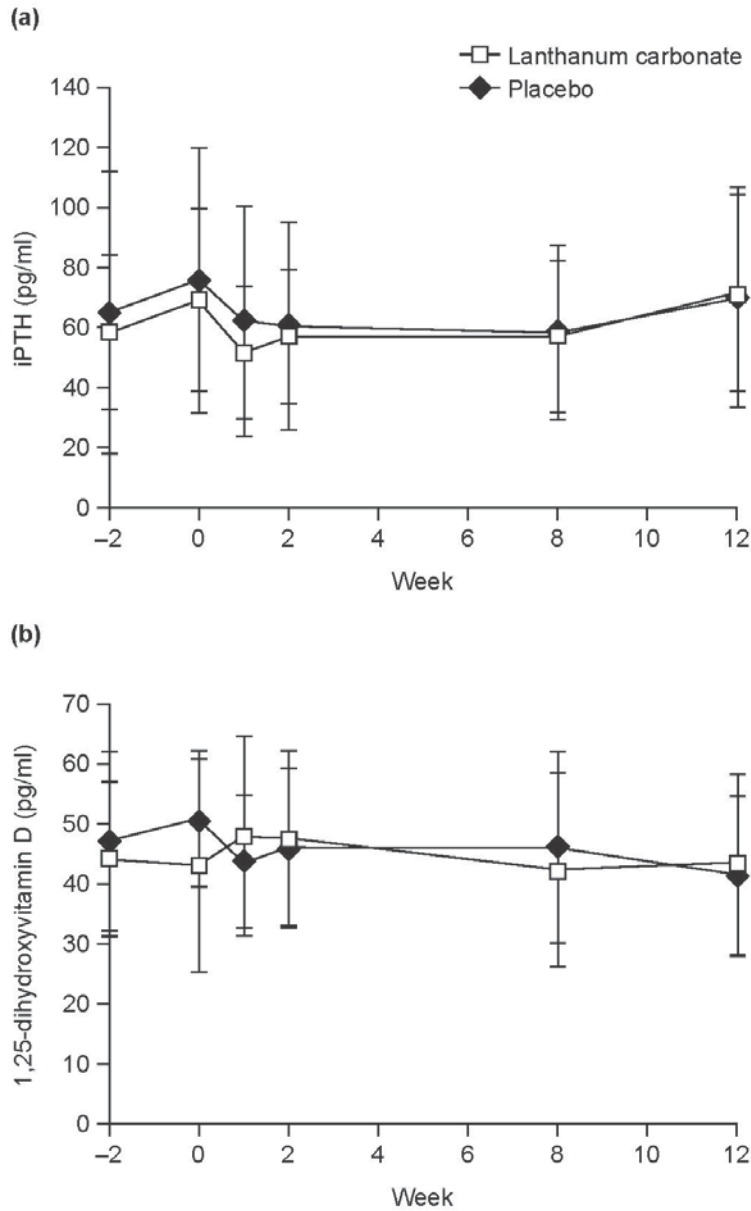

Graphs show mean  $\pm$  standard deviation.

iPTH, intact parathyroid hormone

Lanthanum carbonate,  $n = 17$ ; placebo  $n = 12$ .
